# Supplementary material for: The Deacetylase Sir2 from the Yeast Clavispora lusitaniae Lacks the Evolutionarily Conserved Capacity to Generate Subtelomeric Heterochromatin
Source: PubMed Central journal article supplement (PMC3814328; doi:10.1371/journal.pgen.1003935), 2013-10-31

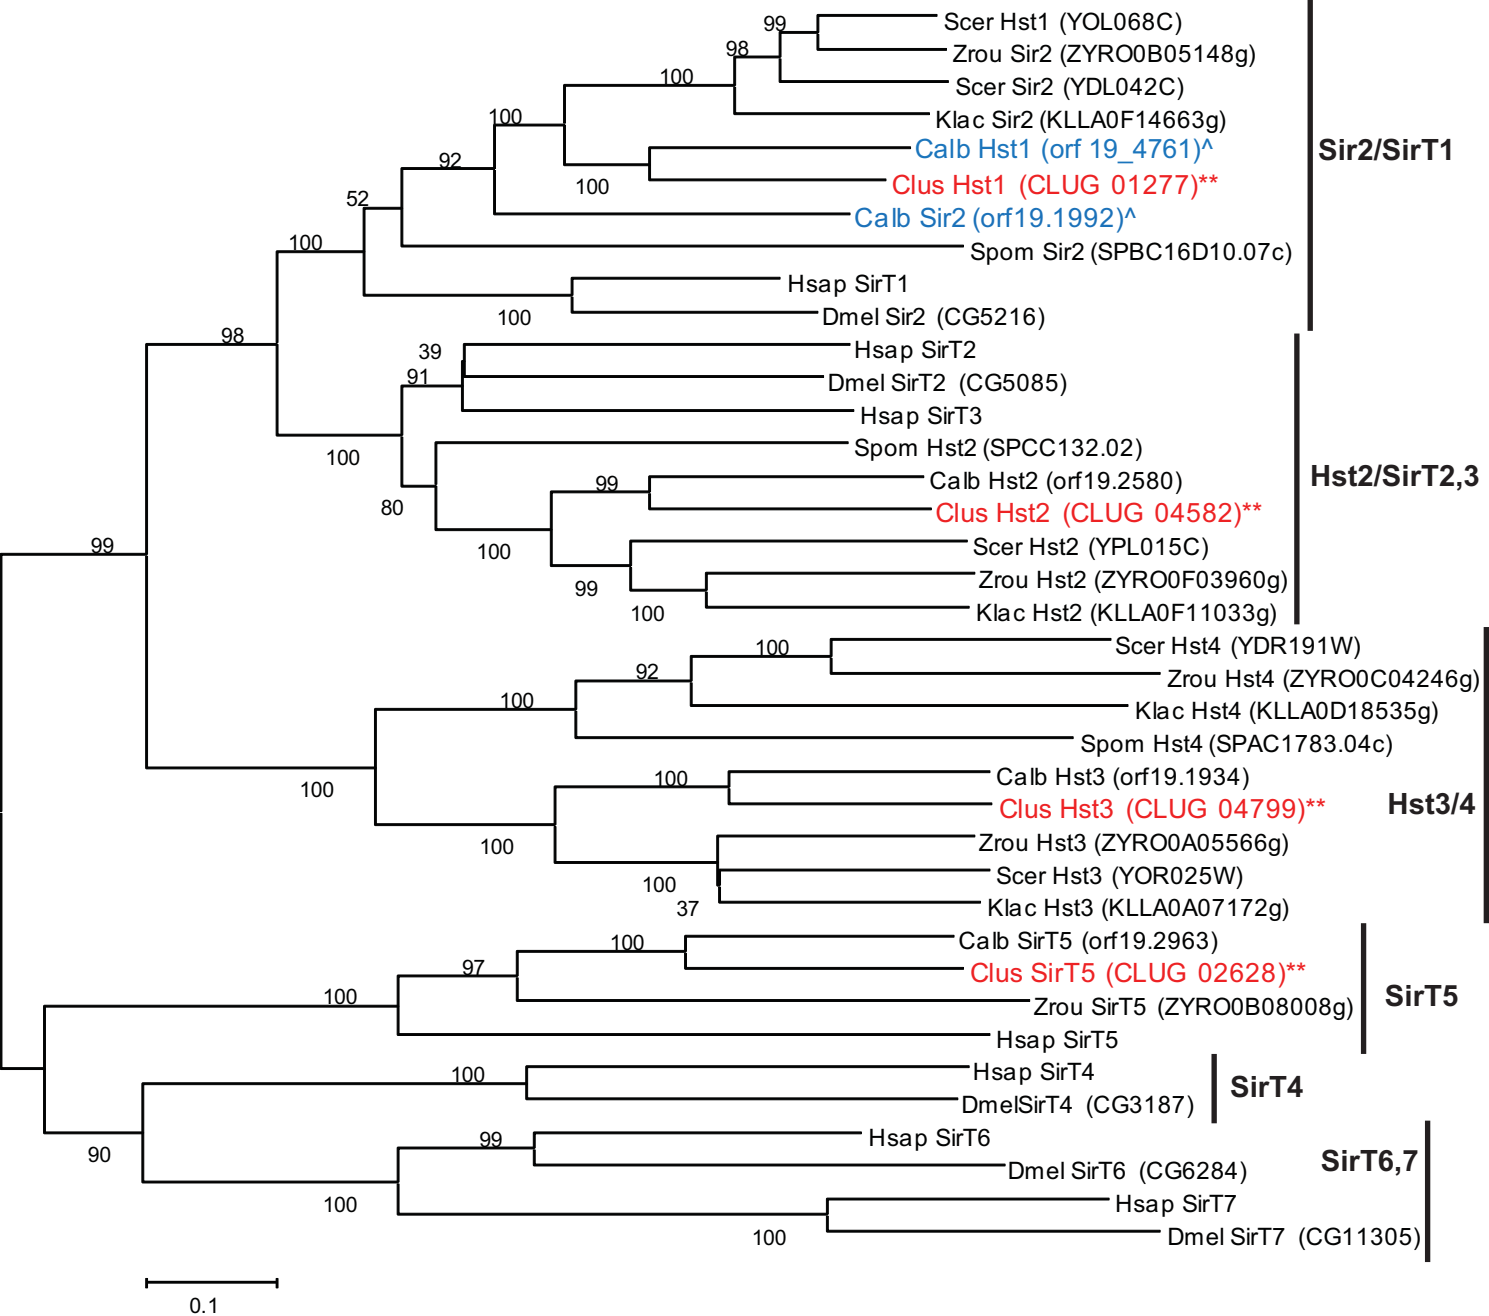

Supplement: pgen.1003935.s001.pdf [file pgen.1003935.s001.pdf]
