# Supplementary material for: The Deacetylase Sir2 from the Yeast Clavispora lusitaniae Lacks the Evolutionarily Conserved Capacity to Generate Subtelomeric Heterochromatin
Source: PubMed Central journal article supplement (PMC3814328; doi:10.1371/journal.pgen.1003935), 2013-10-31
Supplement: pgen.1003935.s005.pdf [file pgen.1003935.s005.pdf]

**Table S1. Oligonucleotides used for ChIP**

| <b><i>C. lusitaniae</i> Target</b>     | <b>Sequence</b>                                      |
|----------------------------------------|------------------------------------------------------|
| CIPRI2 (CLUG_00368)                    | CGGAGCAAATCGCAAGTACC<br>GTGTTGTTGAAGACGCGTAGTG       |
| <b>rDNA</b>                            |                                                      |
| NTS1                                   | CATACGACTTAGATGTACAACGGAG<br>GTTGGGCGTCACTTGGC       |
| NTS1                                   | GATCTGGAGAATAGGAATTAAGTGG<br>CTTGATTTTGCATCTTTCGCCTG |
| NTS1                                   | GCAAATACAATGAAGCGGTCATCAG<br>CCTGGTGTGTATCGCCTG      |
| 8S gene promoter                       | GACTAACGTTGATCGGACGG<br>CCAATCCCTCCGCAACTATATAAACC   |
| NTS2                                   | CTCGGATCAAGCCCTAATTAGG<br>GGCACACCACAAAATTACGAAAACG  |
| NTS2                                   | GCCTCATCGGGGGAAAAAAC<br>GTTGTCGCTAACATTTTTATGGACG    |
| NTS2                                   | GACAATGTCAGGGCGAGC<br>CAGGGTGCGAGAATATACCG           |
| 18S gene                               | CTGCGAAAAGCATTTGCCAAGG<br>CTTGCGACCATACTCCCC         |
| Junction between 5.8S<br>and 26S genes | CTCGAGGCATTCTCGAG<br>CTGGGGCAATCCCTGTTG              |
| 26S gene                               | GGAAACTCTGGTGGAGGC<br>GGCTAAGGCTATTTCCGCC            |
| 26S gene                               | CTCCAAGGTTAACAGCCTCTAG<br>GGGTTGGCAAGCAAGCAC         |
| 26S gene                               | GCTCTTCTATCATAACCGAAGC<br>GGTGCCTGATCAGACAGG         |
| <b>Telomeres</b>                       |                                                      |
| Telomere 2L                            | GCACCTGAGTTGTTTTACAG<br>GCTTTTCGTGACAATTGACATGGC     |
| Telomere 4R                            | GGTTTCTCGATTGTTGACGACTC<br>CAGTAAGCGAGTCTTCCAGTG     |
| Telomere 5L                            | CGTGTGAGCAATGGGTTGTAAAC<br>GTTAGCAAGGAATTGACTCCTAGTC |
| Telomere 7L                            | CCTAGTCGGGCACCTAAG<br>CCGTCCCCTCACTAAAAACAAC         |
| Telomere 7R                            | GCCCTTTCATACTCTACAACG<br>CGCATTTGGAAAGAGGTTGATATC    |

---

**Gene Promoters**

---

|                   |                                                |
|-------------------|------------------------------------------------|
| <i>CLUG_01197</i> | GCGAGTTTCGCGTAAGTAGC<br>CGAACACTGGAACGGTAACG   |
| <i>CLUG_02300</i> | CCAACACAGAAGCAATTGTCACC<br>GGAAAACAGGGAGCGAAGC |
| <i>CLUG_02516</i> | GACTTTGTCCGAGACACCG<br>CTCGTAGTTGGTGTCTGCG     |
| <i>CLUG_02906</i> | CCCCTCTAAAAGCATGTAGTACAC<br>CTGAAGGAGAAGCCGGAG |
| <i>CLUG_03274</i> | GCGCTGATAACGGCTCAG<br>GAACGGGCAGAAAACGGAAAC    |
| <i>CLUG_05602</i> | CCGTACATCATCAATGTAGTGGC<br>CAGTAAGGGCTGAACTCGC |

---
