# Supplementary material for: The Deacetylase Sir2 from the Yeast Clavispora lusitaniae Lacks the Evolutionarily Conserved Capacity to Generate Subtelomeric Heterochromatin
Source: PubMed Central journal article supplement (PMC3814328; doi:10.1371/journal.pgen.1003935), 2013-10-31
Supplement: pgen.1003935.s006.pdf [file pgen.1003935.s006.pdf]

**Table S2. Oligonucleotides used for RT-PCR**

| <b><i>C. lusitaniae</i> Target</b>     | <b>Sequence</b>                                   |
|----------------------------------------|---------------------------------------------------|
| <i>CIPRI2</i><br>( <i>CLUG_00368</i> ) | GCCCACGGATGTCCTTAC<br>CAACTGCCTCGACCTGTC          |
| <i>CLUG_01197</i>                      | GTCTGGACAATCCACTGCG<br>GACTGGCGACAGAAAGACG        |
| <i>CLUG_02300</i>                      | GTCCTACACAGACCCATCG<br>CTTGTGGCGGAACAACCG         |
| <i>CLUG_02906</i>                      | GCTCCGGCATTGGCATTG<br>CTTAGCGACCTCTTGTTC          |
| <i>CLUG_03274</i>                      | GACTCAAACACCAACGGGTC<br>GGAAACGCCAGTGACGAC        |
| <i>CLUG_03674</i>                      | GCTATCCTCCGCACTGTC<br>GCCCCATCTACGCAACATC         |
| <i>CLUG_03702</i>                      | GGCATAGGTCAGGCCAATTC<br>GGACACTTGAGGGTAGGG        |
| <i>CLUG_04043</i>                      | CCACAAGGTAAGTGGTCTCC<br>GCGCCGTTTCATCTCGTTG       |
| <i>CLUG_00157</i>                      | CTTGGATGTGAAGTACCACAAGC<br>GGTCGCTAGTTTCCTTTGGAAC |
| <i>CLUG_01649</i>                      | GGGTCAGTTGATGGGAATGG<br>CATCATTTTCAGCTCCAACGGC    |
| <i>CLUG_02516</i>                      | CACACGTAATGTGCTCCGG<br>GGACCTTACTACGTGGAGTTG      |
| <i>CLUG_05168</i>                      | GTCAACTCCCTGCTGTTTGG<br>CTCCAATGTCTGTCTGCGTC      |
| <i>CLUG_05602</i>                      | GGTACGACTGATCCCAAAACC<br>CAGTCCAACGACCCACAG       |
| <i>CLUG_05766</i>                      | CCATTCCACTGGAAGGCTAC<br>GCTCCTTCTTGATGTTTGC       |
