# Supplementary material for: The Deacetylase Sir2 from the Yeast Clavispora lusitaniae Lacks the Evolutionarily Conserved Capacity to Generate Subtelomeric Heterochromatin
Source: PubMed Central journal article supplement (PMC3814328; doi:10.1371/journal.pgen.1003935), 2013-10-31
Supplement: pgen.1003935.s007.pdf [file pgen.1003935.s007.pdf]

**Table S3. Oligonucleotides used to generate probes**

| <b><i>C. lusitaniae</i> Target</b> | <b>Sequence</b>                                 |
|------------------------------------|-------------------------------------------------|
| 2L probe                           | GCACCTGAGTTGGTTTCACAG<br>GCAGGCATCTGGGAGTTG     |
| 4R probe                           | GGGTGACTCAACTCGGGT<br>GTCACCCACATACATTGGCC      |
| 5L probe                           | CGTGTGAGCAATGGGTTGTAAAC<br>GCAAAAAGTGGCGACTGACG |
| 7R probe                           | GCCCTCTTCACTCTACAACG<br>GTCTGTGAAGTCAGCCAATTGC  |
| 7L probe                           | CCTAGTCGGGCACCTAAG<br>CAAGTCCACTGTTCCGAATGG     |
